# Supplementary material for: The evolution of the M1 local structure during preparation of VMoNbTeO catalysts for ethane oxidative dehydrogenation to ethylene
Source: Royal Society of Chemistry journal article supplement (doi:10.1039/c8ra06424e), 2018-01-01
Supplement: c8ra06424e1.pdf [file c8ra06424e1.pdf]

## The evolution of the M1 local structure during preparation of VMoNbTeO catalyst for ethane oxidative dehydrogenation to ethylene

Kardash T.Yu.<sup>\*a</sup>, Lazareva E.V.<sup>a</sup>, Svintsitskiy D.A.<sup>a</sup>, Bondareva V.M.<sup>a</sup> and Neder R.B.<sup>b</sup>

*a* - Boreskov Institute of Catalysis SB RAS, Russia, 630090, Novosibirsk, Pr. Ak. Lavrentieva, 5.

*b* - Friedrich-Alexander University of Erlangen-Nuremberg, Germany, 91058 Erlangen, Staudtstr. 3.

Corresponding author: [kardash@catalysis.ru](mailto:kardash@catalysis.ru)

### Supplementary materials:

**Table S1.** The structural parameters of the crystalline M1 phase calculated from the Rietveld fit

|                         |                                                                                              |
|-------------------------|----------------------------------------------------------------------------------------------|
| Chemical composition    | (TeO) <sub>0.39</sub> (V <sub>1.1</sub> Mo <sub>3.5</sub> Nb <sub>0.4</sub> )O <sub>14</sub> |
| Space Group             | Pba2 (32)                                                                                    |
| Cell parameters         | a = 21.156(2)<br>b = 26.663(4)<br>c = 4.018(5)                                               |
| Degree of crystallinity | 80%                                                                                          |
| Particle size (CSD), nm | 60(2)                                                                                        |
| Rwp, %                  | 6.2                                                                                          |

**Table S2.** Surface ratios of elements for studied VMoTeNb samples based on XPS data.

|       | D1   | H310 | H350 | H400 | H450 | H500 | H550 |
|-------|------|------|------|------|------|------|------|
| V/Mo  | 0.42 | 0.22 | 0.28 | 0.25 | 0.27 | 0.25 | 0.24 |
| Nb/Mo | 0.09 | 0.09 | 0.09 | 0.09 | 0.10 | 0.10 | 0.11 |
| Te/Mo | 0.34 | 0.30 | 0.29 | 0.30 | 0.31 | 0.31 | 0.37 |
| O/Mo  | 7.7  | 5.9  | 5.8  | 5.7  | 5.6  | 5.4  | 5.8  |
| C/Mo  | 4.5  | 2.4  | 2.3  | 2.5  | 2.0  | 1.6  | 1.6  |

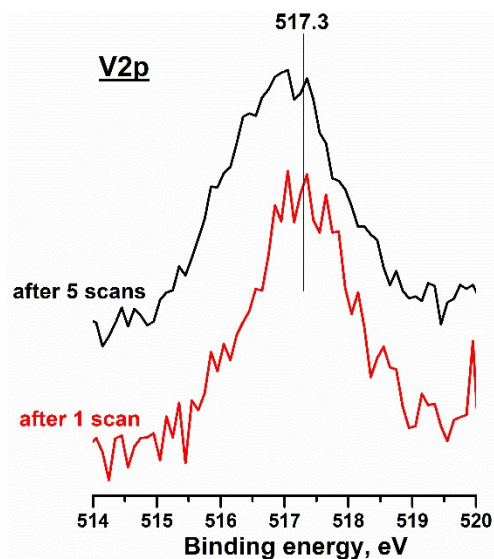

**Figure S1.** Evolution of V2p spectrum for the spray-dried precursor of VMoNbTe oxide during XPS acquisition.

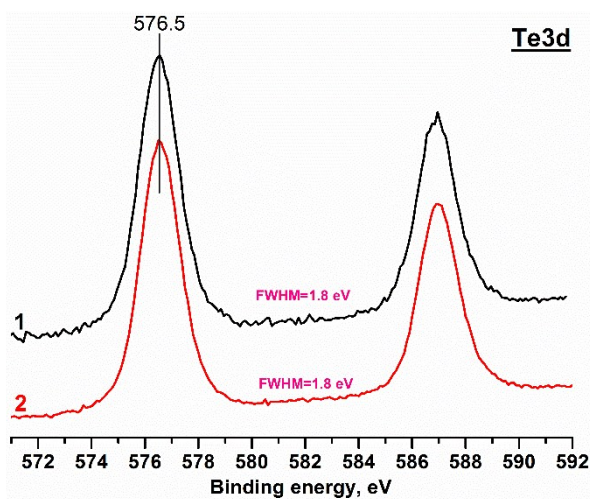

**Figure S2.** Te3d spectra for VMoNbTe mixed oxide in the form of: 1 – slurry after spray-drying (dry precursor); 2 – dry precursor after thermal treatment in He at 550°C.

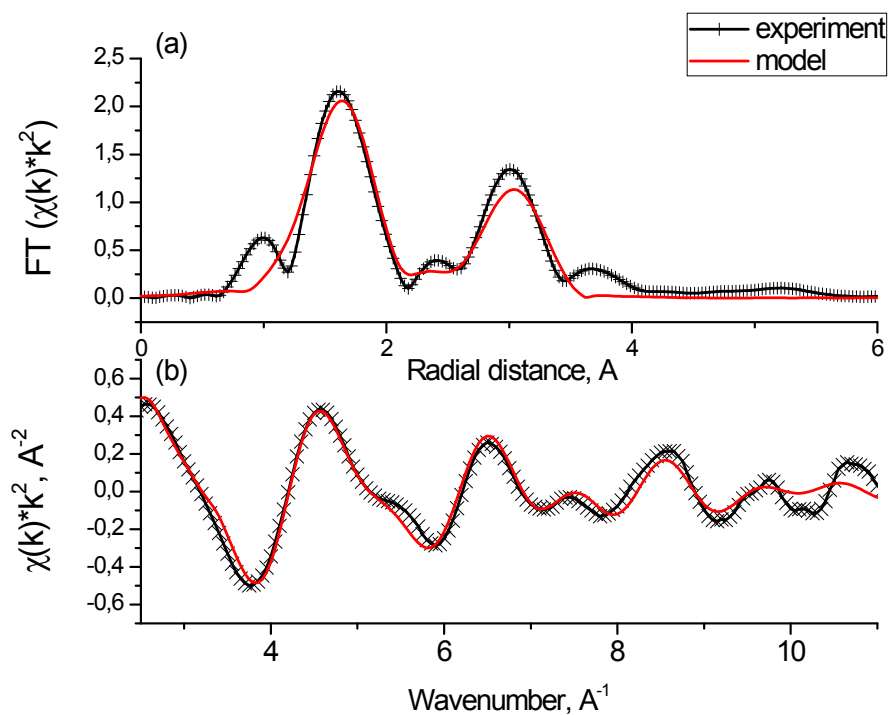

**Figure S3. Fourier transform (a), Nb K-edge  $k^2$ -weighted EXAFS spectra (b) and fits of the spray-dried slurry; experimental data is shown with crossed line, fits – solid line.**

**Table S3 Nb K-edge fitting results for the spray-dried slurry. R-factor=0.04;  $S_0^2=0.33(1)$**

| Shell | Coordination number | R, Å    | $\sigma^2, \text{Å}^{-2}$ |
|-------|---------------------|---------|---------------------------|
| O     | 6                   | 2.12(1) | 0.009(25)                 |
| Nb    | 2                   | 3.38(2) | 0.013(1)                  |
